# Supplementary material
Source: Springer Nature journal article supplement (https://www.springermedizin.de/resource/supplementary/12913_2012_3180_MOESM1_ESM.pdf/9532584)
Supplement: MOESM1 [file 9532584]

14,077 Households screened during Phase 1 (September 2008- April 2010)

1789 pre-school children eligible for Phase 1 assessment

1581 eligible pre-school children underwent Phase 1 assessment

516/1581(33%) children had at least 1 referral from Phase 1

503 children awaiting  
Phase 2 assessment  
(as of October 2011)\*

1078 children completed Phase 2  
assessment  
(as of October 2011)\*

**303/1078 (28%)** of Phase 2 children  
received referral during Phase 1  
(as of October 2011)\*
